# Supplementary material for: A Comparative Study of Genetic Diversity and Multiplicity of Infection in Uncomplicated Plasmodium falciparum Infections in Selected Regions of Pre-Elimination and High Transmission Settings Using MSP1 and MSP2 Genes
Source: MDPI journal article supplement (doi:10.3390/pathogens13020172), 2024-02-13
Supplement: s1 [file s1]

Supplementary:

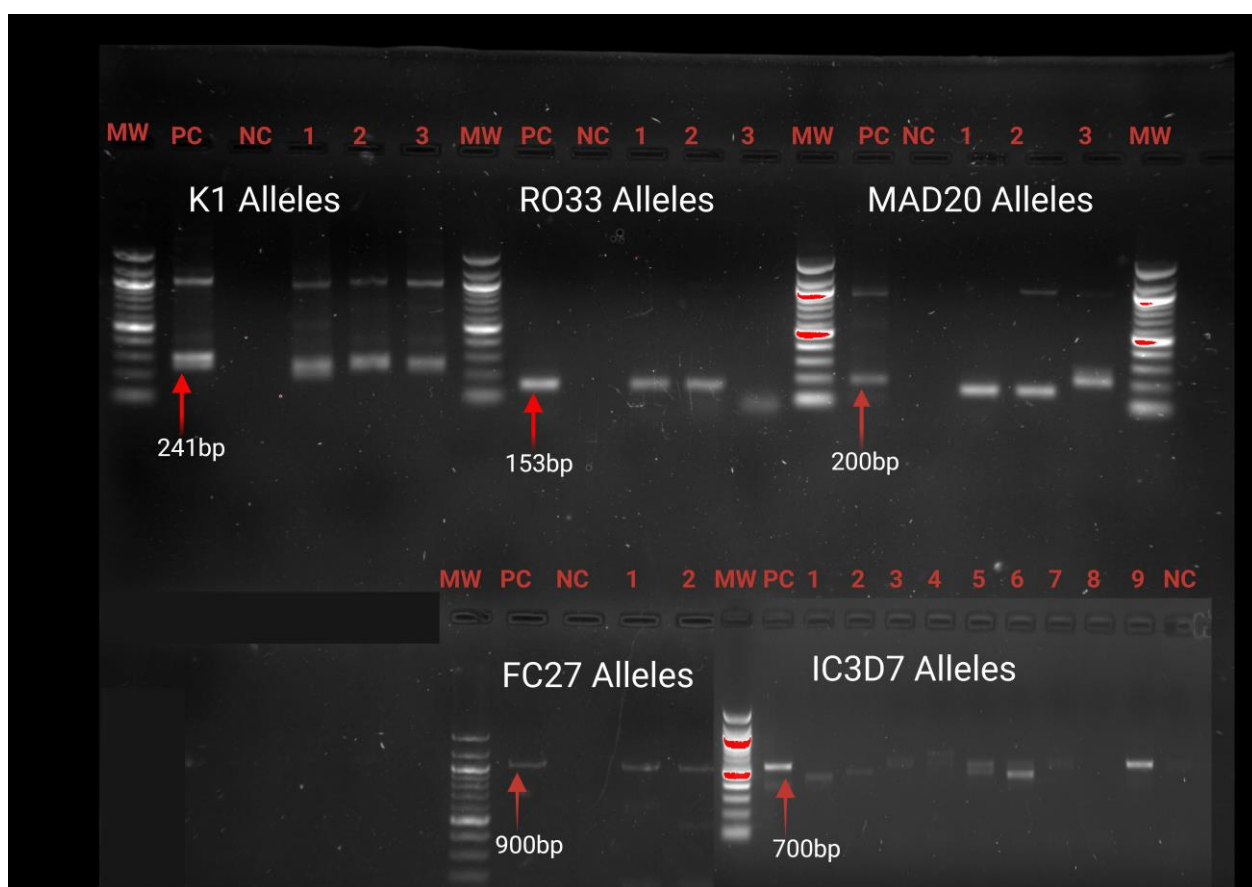

Supplementary Figure S1: Representative gel picture showing the *msp1* and *msp2* allele families  
 MW: molecular weight, PC: positive control, NC: negative control, 1, 2, 3, 4, 5, 6, 7, 8 and 9, represent each well containing isolates.
